# Supplementary material for: Matching global cobalt demand under different scenarios for co-production and mining attractiveness
Source: Springer Nature journal article supplement (doi:10.1186/s40008-016-0035-x), 2016-02-09
Supplement: MOESM2 [file 11901278]

## Sheet: Description
Sheet:	Apparent_consumption
	This sheet shows the apparent consumption of cobalt that were estimated and used for the hybrid SUT and MRIO. The first row shows the code of the cobalt using industry, the columns represents the demand per region in tons of refined cobalt. This data was used as input to the hybrid-Use table and the sum accross the sectors as input for the hybrid-Supply table.
Sheet:	Mine_production
	This sheet shows the regional mine production of copper and nickel as of 2007 taken respectively from the 2008 Mineral Yearbook of the metal from USGS. It is used to derive the ore and conccentrate price in the different region.
Sheet:	Production_factor
	This sheet presents the input data for the optimization routine. We show the assumed average ore grades, reserves of ore and estimated mine production in 2007 (the estimation process is explained in SI 1). Mine production in 2007 is used as proxy for the mining capacity in 2007. And the averaged mining attractiveness is converted to mining risks by using the complement: risk = 100 - attractivenes…
Sheet:	GDP_projections
	This sheet shows the growth rate projections that was assumed in our model. If not otherwise indicated growth rate before 2010 is from historic GDP from the OECD and after 2010 from their long-term GDP growth.

## Sheet: Apparent_consumption
region\ consuming sector	57	69	71	74
Canada	24.5093	16.0609	23.1784	24.3006
USA	2520.19	4879.37	1886.73	0
Mexico	17.5425	11.4956	16.5899	17.3931
Brazil	23.4686	15.3789	22.1942	23.2687
South Africa	23.4372	15.3584	22.1645	23.2376
Western Europe	3397.15	1994.31	2345.03	176.087
Central Europe	849.287	498.578	586.258	44.0217
Russia	509.883	334.126	482.195	505.542
RoW Middle East	0	121.431	175.243	183.728
Turkey	42.3792	27.771	40.0779	42.0184
India	485.95	318.442	459.562	481.813
Korea	440.434	288.616	416.518	436.685
China	2231.79	0	1690.86	6517.56
Indonesia	169.561	111.113	160.354	168.118
Japan	3854.44	2525.81	3645.14	3821.62
Oceania	66.8044	43.7768	63.1767	66.2356
RoW America	20.1339	13.1937	19.0406	19.9625
RoW Europe	23.391	15.3281	22.1209	23.1919
Row Asia Oceania	683.892	448.154	646.755	678.07
RoW Africa	72.7649	47.6828	68.8136	72.1454

## Sheet: Mine_production
	Copper Mine Production (tons Cu)	Nickel Mine Production (tons Ni)
Canada	589115	254784
USA	1170000	0
Mexico	358000	0
Brazil	199000	58317
South Africa	97000	37877
Western Europe	159519	6640
Central Europe	578113	24825
Russia	740000	279773
RoW Middle East	249750	0
Turkey	49000	2000
India	34700	0
Korea	0	0
China	946000	85000
Indonesia	772900	229000
Japan	0	0
Oceania	871000	160457
RoW America	6928746	257985
RoW Europe	36000	12600
Row Asia Oceania	946185	203585
RoW Africa	713075	45200

## Sheet: Production_factor
Mine type	Region	Co (kg/kg ore)	Cu (kg/kg ore)	Ni (kg/kg ore)	Reserves Ore (Mt)	Mine production (Mt ore)	Regional averaged mining Attractiveness
Cobalt Mines	Canada	0	0	0	0	0	0
Cobalt Mines	USA	0	0	0	0	0	0
Cobalt Mines	Mexico	0	0	0	0	0	0
Cobalt Mines	Brazil	0	0	0	0	0	0
Cobalt Mines	South Africa	0	0	0	0	0	0
Cobalt Mines	Western Europe	0	0	0	0	0	0
Cobalt Mines	Central Europe	0	0	0	0	0	0
Cobalt Mines	Russia	0	0	0	0	0	0
Cobalt Mines	RoW Middle East	0	0	0	0	0	0
Cobalt Mines	Turkey	0	0	0	0	0	0
Cobalt Mines	India	0	0	0	0	0	0
Cobalt Mines	Korea	0	0	0	0	0	0
Cobalt Mines	China	0	0	0	0	0	0
Cobalt Mines	Indonesia	0	0	0	0	0	0
Cobalt Mines	Japan	0	0	0	0	0	0
Cobalt Mines	Oceania	0	0	0	0	0	0
Cobalt Mines	RoW America	0	0	0	0	0	0
Cobalt Mines	RoW Europe	0	0	0	0	0	0
Cobalt Mines	Row Asia Oceania	0	0	0	0	0	0
Cobalt Mines	RoW Africa	0.01	0	0	1.48	0.14	64
Cobalt-Copper Mines	Canada	0.000581356	0.0150965	0	146.67	1.47948	71.7667
Cobalt-Copper Mines	USA	0.00619426	0.0069083	0	3.30765	0.0224546	61.5923
Cobalt-Copper Mines	Mexico	0	0	0	0	0	65.7
Cobalt-Copper Mines	Brazil	0	0	0	0	0	53.9
Cobalt-Copper Mines	South Africa	0	0	0	0	0	47.8
Cobalt-Copper Mines	Western Europe	0	0	0	0	0	41.4764
Cobalt-Copper Mines	Central Europe	0.0017	0.0034	0	4.68	0.0682846	39.2829
Cobalt-Copper Mines	Russia	0	0	0	0	0	49.8
Cobalt-Copper Mines	RoW Middle East	0	0	0	0	0	0
Cobalt-Copper Mines	Turkey	0	0	0	0	0	64.7
Cobalt-Copper Mines	India	0	0	0	0	0	49.2
Cobalt-Copper Mines	Korea	0	0	0	0	0	0
Cobalt-Copper Mines	China	0	0	0	0	0	46.8
Cobalt-Copper Mines	Indonesia	0	0	0	0	0	50.9
Cobalt-Copper Mines	Japan	0	0	0	0	0	0
Cobalt-Copper Mines	Oceania	0	0	0	0	0	62.7857
Cobalt-Copper Mines	RoW America	0	0	0	0	0	68.2875
Cobalt-Copper Mines	RoW Europe	0	0	0	0	0	57.7
Cobalt-Copper Mines	Row Asia Oceania	0	0	0	0	0	50.8866
Cobalt-Copper Mines	RoW Africa	0.00229583	0.0189467	0	2682.88	13.4326	50.5332
Cobalt-Nickel Mines	Canada	0.000117577	0	0.00239306	3947.05	45.8714	71.7667
Cobalt-Nickel Mines	USA	0.0009	0	0.0086	34.02	0	0
Cobalt-Nickel Mines	Mexico	0	0	0	0	0	0
Cobalt-Nickel Mines	Brazil	0.00101888	0	0.0129707	514.1	1.82347	53.9
Cobalt-Nickel Mines	South Africa	0	0	0	0	0	47.8
Cobalt-Nickel Mines	Western Europe	0	0	0	0	0	48.466
Cobalt-Nickel Mines	Central Europe	0	0	0	0	0	61.0894
Cobalt-Nickel Mines	Russia	0.000624658	0	0.0102665	171.3	1.96269	49.8
Cobalt-Nickel Mines	RoW Middle East	0	0	0	0	0	0
Cobalt-Nickel Mines	Turkey	0.000553922	0	0.0113	33.2	0.0617582	64.7
Cobalt-Nickel Mines	India	0.00116313	0	0.00937238	123.18	0	0
Cobalt-Nickel Mines	Korea	0	0	0	0	0	0
Cobalt-Nickel Mines	China	0.00108532	0	0.000669873	3.16	0.0447509	46.8
Cobalt-Nickel Mines	Indonesia	0.000715963	0	0.0152335	653.52	4.49537	50.9
Cobalt-Nickel Mines	Japan	0	0	0	0	0	0
Cobalt-Nickel Mines	Oceania	0.000559814	0	0.00754978	3426.21	12.665	62.7857
Cobalt-Nickel Mines	RoW America	0.000942435	0	0.0119738	1437.02	14.5035	50.9083
Cobalt-Nickel Mines	RoW Europe	0.000582857	0	0.011541	80.5	0.234988	0
Cobalt-Nickel Mines	Row Asia Oceania	0.000789229	0	0.0117945	2045.33	10.2939	51.0668
Cobalt-Nickel Mines	RoW Africa	0.00108628	0	0.0104337	1351.48	2.78755	57.5982
Cobalt-Copper-Nickel Mines	Canada	0.000458941	0.00815618	0.0105795	834.189	8.41457	71.7667
Cobalt-Copper-Nickel Mines	USA	8.63624e-05	0.00426222	0.00134149	2121.73	14.4038	61.5923
Cobalt-Copper-Nickel Mines	Mexico	0	0	0	0	0	65.7
Cobalt-Copper-Nickel Mines	Brazil	9.74959e-05	0.0016613	0.00619109	240.839	1.99356	53.9
Cobalt-Copper-Nickel Mines	South Africa	0	0	0	0	0	47.8
Cobalt-Copper-Nickel Mines	Western Europe	0.000249995	0.00200563	0.00463704	21.928	0.426004	41.4764
Cobalt-Copper-Nickel Mines	Central Europe	0.000214598	0.00488329	0.00224819	1609.14	23.4786	39.2829
Cobalt-Copper-Nickel Mines	Russia	0.000159768	0.00270454	0.00381099	807.89	11.7231	49.8
Cobalt-Copper-Nickel Mines	RoW Middle East	0	0	0	0	0	0
Cobalt-Copper-Nickel Mines	Turkey	0	0	0	0	0	64.7
Cobalt-Copper-Nickel Mines	India	0	0	0	0	0	49.2
Cobalt-Copper-Nickel Mines	Korea	0	0	0	0	0	0
Cobalt-Copper-Nickel Mines	China	0.00025	0.0087963	0.0138889	432	88.3326	46.8
Cobalt-Copper-Nickel Mines	Indonesia	0	0	0	0	0	50.9
Cobalt-Copper-Nickel Mines	Japan	0	0	0	0	0	0
Cobalt-Copper-Nickel Mines	Oceania	0.000770718	0.00478479	0.00263957	165.401	1.18103	62.7857
Cobalt-Copper-Nickel Mines	RoW America	0.0003	0.00408364	0.0041	4.6028	0.0342348	68.2875
Cobalt-Copper-Nickel Mines	RoW Europe	0	0	0	0	0	57.7
Cobalt-Copper-Nickel Mines	Row Asia Oceania	5.23218e-05	0.00129487	0.00751936	21.75	0.120974	50.8866
Cobalt-Copper-Nickel Mines	RoW Africa	0.000946427	0.00181188	0.00997488	193.368	0.968152	50.5332
Copper Mines	Canada	0	0.00285474	0	17136.3	172.856	71.7667
Copper Mines	USA	0	0.00336208	0	45276.9	307.37	61.5923
Copper Mines	Mexico	0	0.00326468	0	17369.4	131.422	65.7
Copper Mines	Brazil	0	0.00611334	0	2556.27	21.1596	53.9
Copper Mines	South Africa	0	0.00571609	0	187.35	1.12433	47.8
Copper Mines	Western Europe	0	0.00341186	0	2915.22	56.6352	41.4764
Copper Mines	Central Europe	0	0.0157432	0	2187.48	31.9169	39.2829
Copper Mines	Russia	0	0.0098472	0	2498.27	36.2518	49.8
Copper Mines	RoW Middle East	0	0.00742037	0	1283.14	21.6523	0
Copper Mines	Turkey	0	0.0136022	0	37.598	3.96994	64.7
Copper Mines	India	0	0.00818771	0	1394.43	3.28541	49.2
Copper Mines	Korea	0	0	0	0	0	0
Copper Mines	China	0	0	0	0	0	46.8
Copper Mines	Indonesia	0	0.00673345	0	7367.89	158.166	50.9
Copper Mines	Japan	0	0	0	0	0	0
Copper Mines	Oceania	0	0.00625211	0	20184.8	144.127	62.7857
Copper Mines	RoW America	0	0.00504833	0	173612	1291.29	68.2875
Copper Mines	RoW Europe	0	0	0	0	0	57.7
Copper Mines	Row Asia Oceania	0	0.00527503	0	33359.7	185.547	50.8866
Copper Mines	RoW Africa	0	0.0109346	0	5417.31	27.1233	50.5332
Nickel Mines	Canada	0	0	0.00133034	1361.02	15.8173	71.7667
Nickel Mines	USA	0	0	0.0091	14.5152	0	0
Nickel Mines	Mexico	0	0	0	0	0	0
Nickel Mines	Brazil	0	0	0.0144836	563.116	1.99732	53.9
Nickel Mines	South Africa	0	0	0.00249021	1620.8	1.84822	47.8
Nickel Mines	Western Europe	0	0	0.000321542	4645.37	18.4897	48.466
Nickel Mines	Central Europe	0	0	0.0103781	322.5	0.986643	61.0894
Nickel Mines	Russia	0	0	0.00876644	288.7	3.30782	49.8
Nickel Mines	RoW Middle East	0	0	0.007	150	0	0
Nickel Mines	Turkey	0	0	0.01	70	0.130213	64.7
Nickel Mines	India	0	0	0.00915371	91.6	0	0
Nickel Mines	Korea	0	0	0	0	0	0
Nickel Mines	China	0	0	0	0	0	46.8
Nickel Mines	Indonesia	0	0	0.0164612	1417.62	9.75139	50.9
Nickel Mines	Japan	0	0	0	0	0	0
Nickel Mines	Oceania	0	0	0.0072155	2168.09	8.0144	62.7857
Nickel Mines	RoW America	0	0	0.0116068	718.2	7.24858	50.9083
Nickel Mines	RoW Europe	0	0	0.00883135	383.558	1.11965	0
Nickel Mines	Row Asia Oceania	0	0	0.0150125	1076.68	5.41882	51.0668
Nickel Mines	RoW Africa	0	0	0.00929008	126.39	0.260691	57.5982
Copper-Nickel Mines	Canada	0	0.00462959	0.00784934	234.635	2.36679	71.7667
Copper-Nickel Mines	USA	0	0.00430469	0.00144402	1541.52	10.4649	61.5923
Copper-Nickel Mines	Mexico	0	0	0	0	0	65.7
Copper-Nickel Mines	Brazil	0	0.00105798	0.00168434	75.0412	0.621156	53.9
Copper-Nickel Mines	South Africa	0	0.000817929	0.00174306	16740.7	100.465	47.8
Copper-Nickel Mines	Western Europe	0	0.00458387	0.00561795	12.972	0.252012	41.4764
Copper-Nickel Mines	Central Europe	0	0.00258805	0.00232926	493.657	7.20281	39.2829
Copper-Nickel Mines	Russia	0	0.00589767	0.0046869	3637.73	52.7862	49.8
Copper-Nickel Mines	RoW Middle East	0	0	0	0	0	0
Copper-Nickel Mines	Turkey	0	0	0	0	0	64.7
Copper-Nickel Mines	India	0	0	0	0	0	49.2
Copper-Nickel Mines	Korea	0	0	0	0	0	0
Copper-Nickel Mines	China	0	0	0	0	0	46.8
Copper-Nickel Mines	Indonesia	0	0	0	0	0	50.9
Copper-Nickel Mines	Japan	0	0	0	0	0	0
Copper-Nickel Mines	Oceania	0	0.00293475	0.00320364	455.728	3.25407	62.7857
Copper-Nickel Mines	RoW America	0	0	0	0	0	68.2875
Copper-Nickel Mines	RoW Europe	0	0	0	0	0	57.7
Copper-Nickel Mines	Row Asia Oceania	0	0	0	0	0	50.8866
Copper-Nickel Mines	RoW Africa	0	0.00150023	0.00172345	2733.03	13.6837	50.5332

## Sheet: GDP_projections
	2006	2007	2008	2009	2010	2011	2012	2013	2014	2015	2016	2017	2018	2019	2020	2021	2022	2023	2024	2025	2026	2027	2028	2029	2030	2031	2032	2033	2034	2035	2036	2037	2038	2039	2040	2041	2042	2043	2044	2045	2046	2047	2048	2049	2050	2051	2052	2053	2054
Canada	0.0200833	0.0117538	-0.0271147	0.0337426	0.0252822	0.0170899	0.0200908	0.0245838	0.0272359	0.0208222	0.0196221	0.0197728	0.020126	0.0204351	0.0206652	0.0208478	0.0210185	0.0210021	0.0208726	0.0207579	0.0206658	0.020574	0.0204564	0.020314	0.0201538	0.0200004	0.0198571	0.0197215	0.0195868	0.0194548	0.0193325	0.0192199	0.0191096	0.0190016	0.0189055	0.0188348	0.0187822	0.0187377	0.0186943	0.0186526	0.0186187	0.0185848	0.0185444	0.0184937	0.0184363	0.0183809	0.018322	0.0182524	0.0181659
US	0.0178992	-0.00290553	-0.0280209	0.0250678	0.0184734	0.027793	0.0187822	0.0275494	0.0352354	0.0327676	0.0296623	0.0276288	0.0264018	0.0256476	0.0251415	0.0247604	0.0244479	0.0241843	0.0239629	0.0237888	0.0236624	0.0235472	0.023271	0.0227932	0.0223114	0.0218365	0.0213671	0.0208942	0.0204179	0.0199446	0.0194838	0.0190397	0.0186084	0.0181917	0.0178009	0.0174467	0.0171255	0.0168291	0.0165508	0.0162909	0.0160512	0.0158243	0.0156032	0.0153821	0.0151619	0.0149451	0.0147262	0.0145002	0.0142608
Mexico	0.0313246	0.0116851	-0.0447222	0.0512537	0.0397088	0.0366782	0.0132035	0.0335775	0.0410466	0.0299306	0.0273718	0.0269531	0.0270722	0.0272951	0.0275436	0.0278409	0.0281334	0.0283872	0.0287908	0.0293425	0.030029	0.0308143	0.0316574	0.0325218	0.0333723	0.0341738	0.0348928	0.0355043	0.0359884	0.0363299	0.0365215	0.0365645	0.0364699	0.03625	0.0359232	0.0355094	0.0350215	0.0344736	0.0338779	0.0332057	0.0324027	0.0316193	0.0308578	0.0301206	0.0294144	0.0287461	0.0281158	0.0275222	0.0269628
Brazil	0.060768	0.0517226	-0.00310486	0.0754902	0.0273907	0.0102842	0.0228287	0.0177386	0.0218695	0.0288134	0.0289936	0.0276002	0.0262868	0.0254119	0.0249661	0.0248719	0.0250458	0.0254036	0.0258643	0.0263552	0.026808	0.0271566	0.0273537	0.0273855	0.027265	0.0270249	0.0266914	0.026286	0.025834	0.0253606	0.0248893	0.0244409	0.0240305	0.0236707	0.0233734	0.0231422	0.0229668	0.022831	0.0227099	0.0225771	0.0224039	0.0221576	0.0218113	0.0213413	0.0207344	0.0199877	0.0191041	0.0181007	0.0169941
South_Africa	0.0558505	0.0536047	0.0319104	-0.0153809	0.0359928	0.0246687	0.0189062	0.0254739	0.0322561	0.0555723	0.0575027	0.0549502	0.0524284	0.0507292	0.0496976	0.0490394	0.0485306	0.0480294	0.0474606	0.0467972	0.0460315	0.0451551	0.044165	0.0430677	0.0418744	0.0406013	0.0392572	0.0378512	0.0363981	0.0349175	0.0334349	0.0319742	0.0305577	0.0292059	0.0279393	0.0267713	0.0257069	0.0247474	0.0238885	0.0231233	0.0224377	0.0218136	0.0212342	0.020684	0.020153	0.0196318	0.0191059	0.0185601	0.0179844
W.Europe	0.0295272	0.0005132	-0.0441307	0.0206201	0.01654	-0.00233952	0.00148098	0.0166668	0.0190305	0.0213671	0.021427	0.0209833	0.0206991	0.0206485	0.0206537	0.0206749	0.0206891	0.0207002	0.0206934	0.0206455	0.0204546	0.0201842	0.019911	0.0196379	0.0193709	0.0191102	0.0188391	0.0185173	0.0181666	0.017812	0.0174724	0.0171486	0.0168342	0.0165307	0.0162493	0.0160026	0.015787	0.0155959	0.0154258	0.0152796	0.0151621	0.0150661	0.0149836	0.0149097	0.014847	0.0147995	0.0147588	0.0147136	0.0146569
C.Europe	0.0512066	0.0244677	-0.0301386	0.0176707	0.018458	-0.00367065	0.000636078	0.0170432	0.0250863	0.0324251	0.0321636	0.0301888	0.0283409	0.0268502	0.0255892	0.0245129	0.0235719	0.0227374	0.022026	0.0214311	0.0209572	0.0205334	0.0200955	0.0196731	0.0192485	0.0188023	0.0183206	0.0177542	0.0171607	0.0165653	0.0159835	0.0154269	0.0149021	0.0144134	0.0139656	0.0135549	0.0131714	0.0128098	0.0124699	0.0121592	0.0118866	0.0116515	0.0114523	0.0112879	0.0111641	0.0110842	0.0110391	0.0110134	0.0109987
Russia	0.0815343	0.0853508	0.0524795	-0.0782089	0.0426418	0.0343555	0.0131869	0.00472417	0.0181074	0.038551	0.0394591	0.0360765	0.0329288	0.0307809	0.0294626	0.0286916	0.0282515	0.0279923	0.0278106	0.0276328	0.0273943	0.0270302	0.0264851	0.0257233	0.0247209	0.0234589	0.0219125	0.0200351	0.0179727	0.015768	0.0134676	0.0111442	0.00888602	0.00679404	0.00497574	0.00353004	0.00254594	0.0020989	0.002237	0.00297575	0.00428655	0.00610544	0.00833704	0.0108502	0.0134907	0.0160899	0.0184805	0.0205187	0.0220843
RoW_M.East	0.0411984	0.0393622	0.0147967	-0.0207128	0.0806884	0.0436372	0.0416237	0.0289278	0.0305744	0.0471744	0.0496308	0.0481347	0.0458695	0.0437588	0.0419694	0.040469	0.0391805	0.0380278	0.0369533	0.0359231	0.0349144	0.0338985	0.0328527	0.0317716	0.0306573	0.0295125	0.028339	0.0271413	0.0259335	0.024735	0.0235626	0.0224403	0.0213886	0.0204234	0.019562	0.0188168	0.0181891	0.017678	0.017276	0.0169739	0.0167575	0.0166051	0.0164957	0.0164072	0.0163212	0.0162203	0.0160837	0.0158957	0.0156401
Turkey	0.0466858	0.00658839	-0.0482588	0.0915695	0.0877275	0.0212746	0.0404969	0.0275192	0.039665	0.0644902	0.0626968	0.0559758	0.0502583	0.0463583	0.0438828	0.0423264	0.0413035	0.0405553	0.0399147	0.0392937	0.0386438	0.0379303	0.0371367	0.0362668	0.0353335	0.0343529	0.0333373	0.0323009	0.0312541	0.0302038	0.0291554	0.0281152	0.0270912	0.0260876	0.0251106	0.024167	0.0232577	0.0223873	0.0215557	0.0207651	0.0200201	0.0193192	0.0186636	0.0180535	0.0174931	0.0169892	0.0165413	0.0161465	0.0158014
India	0.0994158	0.0609508	0.0521452	0.111125	0.0777737	0.0488273	0.0447665	0.0491573	0.0586846	0.0607157	0.0595785	0.0588877	0.0586621	0.0586993	0.0588322	0.0589502	0.0589979	0.058948	0.0587897	0.0585247	0.0581549	0.0576748	0.0570826	0.0563894	0.0556104	0.0547568	0.0538374	0.0528597	0.0518379	0.050791	0.0497456	0.0487181	0.0477158	0.0467447	0.0458126	0.0449222	0.0440707	0.0432537	0.0424679	0.041713	0.0409851	0.0402758	0.0395745	0.0388754	0.0381794	0.0374888	0.0367967	0.0360916	0.0353652
Korea	0.054634	0.0282921	0.00707518	0.0649679	0.0368169	0.0229239	0.0297111	0.0395806	0.0419609	0.0363019	0.0341661	0.0330526	0.0321791	0.0313039	0.0303676	0.0293757	0.0283549	0.0273463	0.026366	0.0254195	0.0245177	0.023662	0.0228603	0.0221124	0.0214182	0.0207828	0.0202051	0.0196827	0.0192101	0.0187822	0.0183971	0.0180445	0.017707	0.0173735	0.0170394	0.0167075	0.0163771	0.0160437	0.0157092	0.0153808	0.0150704	0.0147819	0.0145096	0.0142544	0.014021	0.013816	0.0136399	0.0134855	0.0133502
China	0.142	0.096	0.092142	0.10447	0.0929989	0.0765255	0.0767119	0.073643	0.0732836	0.0668971	0.0620433	0.0579551	0.0544518	0.0513944	0.0486752	0.0462247	0.0440076	0.0420069	0.0402217	0.0386664	0.0373563	0.03629	0.0354593	0.0348564	0.0344623	0.0342398	0.0341255	0.0340404	0.0339066	0.0336502	0.0332077	0.0325379	0.0316233	0.0304752	0.0291353	0.0276666	0.0261302	0.0245893	0.0231013	0.0217193	0.0204857	0.0194272	0.0185604	0.0178845	0.0173863	0.0170378	0.0168028	0.0166469	0.0165267
Indonesia	0.0634502	0.060137	0.0462888	0.0622386	0.0648562	0.0626367	0.0578122	0.0569879	0.0626052	0.0589801	0.058019	0.057773	0.0575486	0.0571706	0.0566251	0.0559403	0.0551411	0.054242	0.0532615	0.0522241	0.0511466	0.0500365	0.0489008	0.0477559	0.0466209	0.0455153	0.0444486	0.0434251	0.0424567	0.0415598	0.0407551	0.0400573	0.0394725	0.0390014	0.0386396	0.0383689	0.0381698	0.0380249	0.0379105	0.0377976	0.037646	0.0374207	0.0370969	0.0366531	0.0360762	0.0353593	0.0344957	0.0334885	0.0323375
Japan	0.0219218	-0.0104165	-0.0552701	0.0465206	-0.00452746	0.01447	0.0153945	0.0116456	0.0124504	0.00654856	0.00640212	0.00759244	0.00878212	0.00970933	0.0104004	0.0109489	0.0114266	0.0118639	0.0122694	0.0126466	0.0129893	0.0132659	0.0134427	0.0135133	0.013367	0.0129606	0.0125663	0.0121923	0.0118404	0.0115068	0.0111934	0.0108981	0.0106264	0.0103884	0.010205	0.0101031	0.0100833	0.0101423	0.0102778	0.010495	0.0108074	0.0112041	0.011665	0.0121718	0.0127133	0.0132864	0.0138659	0.0141918	0.0143365
Oceania	0.0468641	0.0252073	0.0155747	0.0225642	0.0257209	0.0363177	0.0244788	0.0257072	0.0291274	0.0383157	0.0391751	0.0378979	0.0365456	0.0354892	0.0344511	0.0337472	0.0332184	0.0328291	0.0324907	0.0315031	0.0313359	0.0311046	0.0307268	0.0302627	0.0293537	0.028947	0.0285558	0.0282027	0.0278494	0.0268849	0.026556	0.0262189	0.0258539	0.0254622	0.0245216	0.0242746	0.0240336	0.0238151	0.0236256	0.0229516	0.0228817	0.0227985	0.0226934	0.0225692	0.0220374	0.0219451	0.0218621	0.0217755	0.0216698
RoW_America	0.0411984	0.0393622	0.0147967	-0.0207128	0.0817642	0.0468575	0.042782	0.0296479	0.0318961	0.05072	0.0534362	0.0517268	0.0491467	0.0467003	0.0445649	0.0427118	0.0410711	0.0395785	0.0381871	0.03687	0.0356087	0.0343785	0.0331606	0.0319488	0.0307415	0.0295375	0.0283342	0.0271321	0.0259399	0.0247712	0.0236433	0.0225691	0.0215582	0.0206212	0.0197724	0.0190226	0.0183728	0.0178209	0.0173601	0.0169835	0.016682	0.0164383	0.0162351	0.0160526	0.0158735	0.0156815	0.0154575	0.0151886	0.0148604
Row_Europe	0.0411984	0.0393622	0.0147967	-0.0207128	0.0860917	0.0451536	0.0428058	0.0284155	0.0298631	0.0494581	0.0523167	0.0505563	0.047928	0.0454994	0.0434525	0.0417429	0.0402769	0.0389648	0.0377417	0.0365699	0.0354254	0.0342808	0.0331153	0.0319237	0.0307067	0.0294654	0.0281997	0.0269119	0.0256159	0.0243321	0.0230837	0.0218897	0.0207654	0.0197266	0.0187913	0.0179727	0.0172735	0.0166937	0.0162272	0.0158664	0.0155996	0.0154065	0.0152657	0.0151535	0.0150482	0.0149288	0.0147711	0.0145574	0.0142686
Row_Asia/Oc	0.0411984	0.0393622	0.0147967	-0.0207128	0.0804966	0.0441601	0.0415402	0.0289014	0.0300485	0.0477912	0.0504589	0.0489285	0.0465665	0.0443507	0.0424595	0.0408625	0.0394807	0.0382359	0.037071	0.035953	0.0348609	0.0337685	0.0326555	0.031517	0.0303542	0.029169	0.0279616	0.0267353	0.0255028	0.0242824	0.023096	0.0219612	0.0208917	0.0199027	0.0190118	0.0182323	0.0175666	0.0170138	0.0165676	0.0162209	0.0159629	0.0157743	0.0156346	0.015521	0.0154134	0.015292	0.0151342	0.014923	0.0146407
Row_Africa	0.0411984	0.0393622	0.0147967	-0.0207128	0.0865845	0.0453923	0.042883	0.0284287	0.02985	0.0497506	0.0526236	0.0508248	0.0481529	0.0456872	0.0436109	0.041878	0.0403933	0.0390658	0.0378294	0.0366461	0.0354912	0.034337	0.0331627	0.0319628	0.030738	0.0294894	0.0282169	0.0269241	0.0256242	0.0243368	0.0230851	0.0218881	0.0207611	0.0197201	0.0187831	0.0179632	0.0172632	0.016683	0.0162165	0.0158562	0.0155902	0.0153979	0.015258	0.0151466	0.0150421	0.0149231	0.0147655	0.0145514	0.0142619
	Growth rate based on non-OECD countries GDP growth
	Growth rate based on World Bank historic GDP data. For RoWs it is taken for non-OECD countries
[truncated: 6 more columns]
